# Supplementary material for: Forage Performance and Detection of Marker Trait Associations with Potential for Napier Grass (<em>Cenchrus Purpureus</em>) Improvement
Source: Preprints.org preprint supplement (doi:10.20944/preprints202002.0202.v1), 2020-02-15
Supplement: Supplementary file 3 [file supplementary]

## Sheet: Sheet1
Marker_ID	Chrom	Pos	DArTseq_sequence_tags	Napier_genomic_sequence	Napier_transcriptom_sequence	Annotation (closest gene function)
30280861|F|0-11:A>G-11:A>G	0	0	TGCAGGTACATATGAAGCTGACGCAAGCTAAACATACCACCG	CAGCACGCGTCTCCGATGTTGAGCTCATGTAACGGGCTCTGTTTTGCTGCCCGTTACCAAAGTCCTCTATGGGCCCAGAGAAACAGTCATTTCACGTGACCGGTGACTAGTTGTGGTAACAGTCGTTGCTTGATGACTGTTACGAATACGTGTTATCAATAACAGGCATCAGCCCGTTACATTTCTTCGCTCATTTGTAACACTTGATCACTNNNNNNNNNNNNNNNNNNNNNNNNNNNNNNNNNNNNNNNNNNNNNNNNNNNNNNNNNNNNNNNNNNNNNNNNNNNNNNNNNNNNNNNNNNNNNNNNNNNNNNNNNNNNNNNNNNNNNNNNNNNNNNNNNNNNNNNNNNNNNCTAGTCTAACTGCAGGTACATATGAAGCTGACGCAAGCTAAACATA…	NA	NA
30283847|F|0-11:A>G-11:A>G	0	0	TGCAGTCGCGGAGGTTCACACCCGCCGACGCCGCGCCGCTGCACTCGCGAGACGGCGGCGGCAGCAGCG	NA	NA	NA
30285085	0	0	TGCAGTAACGTTAATATAGATATATACTACTGTAGTAAACCG	ATGAATGCAACACTCACACAATCATTTTATTTAATTTAGAATAACAATCAAAAACTTTTTCCTATTCTATATTTCCTGTAAAGAAAATAAATGTTGAATTTTTTTTTAAAATTATGAGAAAATTATTATTTAATTAATCTTTCTATTCACATCCTGAAATTTAATTTCAGGGTGTGACAAGTGAGTATACTGCAGTAACGTTAATATAGATATATACTACTGTAGTAAACCGGTAACCTGGGGATCAGAAAATTTTCTAGGACCCTAGTTTTCCCCCCTAGATATTCCACTGCGTCAACATAAAATGCAAGACATTCTTGATTCTTCAGGAACAGACGACACTCACATAGTCACATTACATAGATTAGAACAGTGTCTTACATACTGGGAGCAACGATT…	NA	NA
23634398	0	0	TGCAGGCCGCCGTGATACTAGTACTACCTCTGTTTTCCTATACATGACGTTTCAGACTAAACAATTAGC	NA	NA	NA
23602557	5	80987694	TGCAGGCCGCAGACCGCGGGCGGGATGGGGCCCCTGAGTAGGTTCCCG	NA	NA	LOW QUALITY PROTEIN: leucine-rich repeat extensin-like protein 7, partial [Setaria italica]
30288908|F|0-63:G>A-63:G>A	4	171105685	TGCAGCACGGCGAGCTTCTCCTCCAGCACGACCCTCAGGTTCTCATCGTACGGGAACGGCAGGGTAATG	NA	GCCCAGTACACCTGCAGCACGGCGAGCTTCTCCTCCAGCACGACCCTCAGGTTCTCATCGTACGGGAATGGCAGGACAATGGCTGCCCCGAACGGCCTTGACGTCAGGCTCCTCGTCTTCCGTATCAGCTCCCTCACGTACTCCGGCGCC	putative nitronate monooxygenase [Dichanthelium oligosanthes]
23603266|F|0-19:A>G-19:A>G	0	0	TGCAGGGTGCAGGCTGCTGACCG	NA	NA	NA
23590251|F|0-17:C>G-17:C>G	4	13853480	TGCAGCAGCACGGGAGGCTGCTGCCAGGTTCCCATCCCGTCGGGGAGCATCAGATCCTTCGACGTGTAC	NA	NA	putative wall-associated receptor kinase-like 16 [Setaria italica]
23642045|F|0-12:A>T-12:A>T	0	0	TGCAGTTCGACCAGGAGAAGTGGCGGCTCGGGTTTGCCAGGGTGCCAATTTTTACGTCGTGCAGTAACT*	CCGCCCGTTCGTGGACGCGTTCGACAAGGCCCTGATGCGGCAGTGGAACACCACCAAGAAGGTGGCGGCGGTGGCGCCGTTCGAGCTCTGTTACGATTCGAGGACGCTCCCTGGGCCGACCAGGATCGGGTGGCTTGTCCCGGACATCGACCTCGTGCTCGAGGGTGGGAAGACCAACTGGACGTTCGACGGCCTCAGCTCCATGGTGGATGTCAACAACTTCACGGTGGCGTGCCTCGGGTTCGTCGAGATGAAGAAGGGCGGATACGGCGGGGCGCCGGCGGTGGTGATCGGAGGGTTCCAGATGGAGAACCACGTCCTGCAGTTCGACCTGGAGAAGAGGCGGCTCGGGTTTGCCAGGGTGCCCATTTTTACGTCGTGCAGTAACTTCAATTTCAC…	GTGAAATTGAAGTTACTGCACGACGTAAAAATGGGCACCCTGGCAAACCCGAGCCGCCTCTTCTCCAGGTCGAACTGCAGGACGTGGTTCTCCATCTGGAACCCTCCGATCACCACCGCCGGCGCCCCGCCGTATCCGCCCTTCTTCATC	aspartic proteinase nepenthesin-2 [Setaria italica]
23619626|F|0-10:T>G-10:T>G	0	0	TGCAGTAGTATAAGACTCTGCGTGGATAAAGGAGTGGAAGGAGGCCG	NA	GGGAAGTAGAGCTGCACTCGAAACCTCAGATGGATTCACCTCGCGCGCTGCGGAAGAAGAGCCTGACTTGGCTTCTGCAGTAGTATAAGACTCTGCGTGGATAAAGGAGTGGAAGGAGGCCGGGCTTTTCTGCAGCAGCTCGCCGTCAGA	NA
23603845|F|0-9:C>G-9:C>G	0	0	TGCAGTAGTCTGCGGCTCTGCGCGGGTGACCG	NA	NA
18160886|F|0-16:G>A-16:G>A	3	254185160	TGCAGTTCGAGGAGGTGGAGAGGATGCTGGAGCGGAAGGACTACAAGCCATGGAAGAGGTACCACGGCG	NA	GGAATTTCATCATGGCTCATTGAGGCCGATCTCACGGTTTTTCGCCGGCCCAGCGTCGCCGACGCCGTGGTACCTCTTCCATGGCTTGTAGTCCTTCCGCTCCAGCATCCTCTCCACCTCCTCGAACTGCAGGCCCTTTGTCTCCGGCAC	probable inositol transporter 2 [Setaria italica]
30288066	3	182446776	TGCAGGACAGCAGCACGAAGGCCGAGCACACGGTGTAGAGGAAGCGCGGTGATGGTGGCCTGCGGTTCG	AGGCTGGCTTCAGAGACAGGAAAAGACGGCGGTTTGGCCTTCGGGTGAGCTCGCCATGCACAAGACAGGGGGCGGTCGTGTAGTTGTNNNNNNNNNNNNNNNNNNNNNNNNNNNNNNNNNNNNNNNNNNNNNNNNNNNNNNNNNNNNNNNNNNNNNNNNNNNNNNNNNNNNNNNNNNNNNNNNNNNNNNNNNNNNNNNNNNNNNNNNNNNNNNNNNNNNNNNNNGCACCTGCAGGATAGCGGCACGAAGGCCGAGCACACGGTGCAGAGGAAGCGCGG	CTGGGTCCAAACCGTGGGGCGTGTCAGTGTTCAAGGCAAGGCAGTGCGTCGGCGCAGCACCTGCAGGACAGCGGCACGAAGGCCGAGCACACAGTGTAGAGGAAGCGCGGTGACGGTGGCCTGCGGTTCGGCGGTGACGCGGAGCTCCGG	NA
23617359|F|0-9:G>C-9:G>C	0	0	TGCAGCCAGGCAGCAGGTGAGTGCCAGGCAGCAGGTGAGTCAGCAGTCAGTCCG	NA	NA	NA
30283369|F|0-22:G>T-22:G>T	0	0	TGCAGGGAAGGGATGAACAATTGTCTCCTTCTACTGCTGGCGTGCACCATGAAAAGCCTTGTACAGGCA	NA	NA	NA
23562266	0	0	TGCAGCGCACGCCGCCGCCACTCCCGCGCGCGGGCGCGGCCG	NA	NA	NA
23621857	0	0	TGCAGATGATCCATATGATGATCAGGTTGAGGATTGAGGAGACAATGCATGGATGGATGTGCCAACAAC	TATGCAGTTGATGGATGTAGTGACCGCATACTTATATGGGTTGCTAGATTCTGATATATACATGAAAGTTCATGAAGGAATTAATATACCAGATAATAAGGCAAATCGCAACATGTATTGCATCAAGTTGCAGAAGTCATTATACAGCTTCAAGCAATCAGGCCGAATGTGGTACAATTGGTTAAGTGAATTCCTTATATCACTAGGGTTCATAAATAGTGATGACTATCCATGTGTCTTCATTAAGAATTCTAAGAAAGGATTTTGCATTATATCGGTTTATGTTGATGATCTTAATATAATTGGCAACGAAGCCGATATTAATGAAGCACGTCATCATTTNNNNNNNNNNNNNNNNNNNNNNNNNNNNNNNNNNNNNNNNNNNNNNNNNNNNNNNNN…	CAAACCTGAAAGGTGGATTAGCTGCATATGATGATCAGGTTGAGGACTTAGGAGACGATGCGTGCATGGATGGATGTGCCAACAACCGGTGGTTGAGAATATCGAGCCAGCTTATTTCAAGAAAAAAAGAAGAAGAAGAGAGAACATGGA	NA
30272381	0	0	TGCAGAGCATGCAGGACACCTGCTGGCAACAGTATACTACTACTCCTTAATCCCCTGCGTGGGTGCGTA	NA	NA	NA
23635042|F|0-28:A>G-28:A>G	4	146455995	TGCAGAGGACGAGAGCGAGTTCAGCTACATCCCG	NA	NA	NA
23592313	6	174210811	TGCAGCTTTGCTGGGCACCCAGTGCGCTGAATAAACAATTGATTGCATTTAATGCAAACCGTTGGCCGA	NA	CCTAGCACCACCCAGCACCTGCAGCTTTGCTGGGCACCCGGTGCGCTGAATAAACAATTGATTGCACTTAATGCAGACCGTTGGCCGGAAGTGAACCGTTGGGCGTTCGGTGTTCAGGCCAACTAGCCGTTGAGCATTGTTCTACAAATA	NA
23601388	0	0	TGCAGCTCAGCTCAAGCTCAGGCGGGGACCG	NA	NA	NA
23613458|F|0-24:C>T-24:C>T	0	0	TGCAGGCTCTACCGTGATGAGGGGCTACCGTCTACTGACACTCTGGAAGGACCACGACGGGATCCGAGA	NA	NA	NA
23558691	3	757407	TGCAGTCCTACACCACTCGCTCACACTCTCCG	NA	NA	NA
23611461|F|0-45:T>C-45:T>C	3	211585606	TGCAGCAGTACGTACTGCTCCACTTGAGTGATCTCAGTCGTCACATGGACCAACTCTCTGAACCTATCA	NA	NA	NA
30273188	2	73142498	TGCAGCTGTTGTGTGCAGAGCAACAGGGCCCTTATTTGTGCAAGATCACAGGTCCCATCAATCAGCAAC	NA	NA	NA
30277167|F|0-41:A>C-41:A>C	0	0	TGCAGCTTTTGGGCTTTCTCCCTATCTCCAGGAATCCATCCATGAACCGTCGAGTGGCGGGAAAAAGAC	NA	NA	NA
23606642	0	0	TGCAGTATAGTACAGACACCCAGGGTCCTGCGGATCATGAATCAAGCAACCG	NA	NA	NA
30285860	7	2351149	TGCAGCCAGGATGCACACGGCTTTGGCCGCCACGAGTCCGTCAACGTGTTTGGCCGCCGCGGTGCCGCC	NA	NA	NA
23551315	0	0	TGCAGACATTTTGCAATGACCAAGTACCTTCTGCTGCCAGATATTCACCG	NA	NA	NA
23622292|F|0-28:T>G-28:T>G	3	258893312	TGCAGGGCGACGGCACCACCGATCCACCTCTCCACCGATCTGGCCGCCATCTGCGGGACGACGCGCCGA	NA	NA	NA
23623489|F|0-66:T>C-66:T>C	0	0	TGCAGCTCATCACCTGGCTGCTGGTGGGTCCCACTCTGCCCTCCTCCTTCGAGTTCGACACGTGGATGC	NA	NA	NA
18149799	0	0	TGCAGCCTGTCAACACTCCATTCCATCGGAACGCCGCCGCCG	NA	NA	NA
23553829	0	0	TGCAGCCCGCACGTGTGAGCGCGAGCTAGAAGAAGAGGAGGAAGAAGCCCTCCG	NA	GACGACGAAGACACTCGATCGGCCATGGCCGCCGGAGGGCTTCTTCCTCCTCTTCTTCTAGCTCGCGCTCACACGTGCGGGCTGCAGTAGATGACCTTGATCTCCTGGACGTTGCGGCACCTCCCGCTGGGCACCTGGGACACGGAGCAG	NA
23547174	0	0	TGCAGCCCAAGAGGCAGGGCTTGCTCACTTGAAGGGACGCAACAGAGGCTTTTAACGGTGTTCCGAGAT	NA	NA	NA
23602556|F|0-16:G>C-16:G>C	0	0	TGCAGGCCGCACGCACGCAGGCGATGAGTGAGAGCGGCCG	NA	NA	NA
23571406	0	0	TGCAGTAGCACGTGGATTTTGTTTTATTCTCATTTCAGTTTGCTAATGAATGATCCG	NA	ATTTTCTCCCTTTCCAGAATTCCGCAGTAGCACGTGGATTTTGTTTTATTCTCATTTCAGTTTGCTAATGAATGATCCGGACTACAGAAGAATATATAAATGCGTGATTGGGTGCAAAATAATCAGTGTGAAGTGGTGCCAGTTTAACAA	uncharacterized protein LOC101764385 [Setaria italica]
23601207|F|0-23:A>G-23:A>G	0	0	TGCAGCGTCGTTGGATATGGCCTAAGAACTCGTAGCTGCCG	NA	NA	NA
23637406|F|0-36:T>C-36:T>C	1	66070274	TGCAGGTTCCACGGAGCCACAAGACGAGGAGGACGATGGGCCATTACAGGGGGGCAAGGACAGCAGGTG	NA	GGGCACTGCGGCATTCTTGGCCTGTCCTTGGAGCCGTGTCCGTACCCACCTGCTGTCCTTGCCCCCCTGTAATGGCCCATCGTCCTCCTCGTCTTGTGGCTCCGTGGAACCTGCAGAAGCGTAGGACGAGGAGGAAGTGAGTAGCCTCTC	NA
23554509	0	0	CGGCCCTTGCGCCCTTGCCCCGTGAGACTGTCTCCAGCGGTGCGCGCAAACGGCGCTGCA	TAAGTAATCAGATCTGATCTGCATGCCAAAACTTACTACATTTGGCTATTTCATGCCACCACTATTCTGTCTAAAAAAACTAGAATTACACTTTTTATAAGACGGAAGGAGTTTGATGATTTAGACCTCAAGTGGCATTCAGCCAGTTTTAAAGACCAAAGGACCAGTTTAAACACCGCTGGTACATTTTTTTTACTATCTTACACTTTAGAAAAGTGGAAAAGTGAGGGCAAATAGTAAACTGATCCTCCCTAGTCCTTGATGTCGTAGTTCACTTATCTCCGTTCTCCAGAGCACTTGTTTAATTTTGTTCGGGTAGTGCTAGCGCCCAAGCATATGATGAGAATTTTTCAGTCAGACGCTCAGCTGTAACAATAATATGAACACTATAGTTTATGC…	CGCTCGGGGGATCGCTGCATTTTGCAGCGCCCGTTGCGGCGACAGCTGGAGCCGCTACAGTGCCTGCCGGCGCTGCAAAATGCAGATGCAGCGCCGTTTGCGCGCACCGCTGGAGACAGTCTGATCTTGAGCAAATTATAACATTGTCAC	NA
23612094|F|0-13:T>C-13:T>C	0	0	TGCAGCGCGAGAGTATTCCCTCGCCCCGAACCCGACAGCGGACTAGTGGAGGAATCGTCCGCTACCCTC	NA	NA	NA
23559758	0	0	TGCAGAAGCTTCTCCGAAGCCAGCACAAACTGGGCTCTAGGCGATGATCTCAAAAGGGCATGCCACAGC	NA	NA	NA
17981556|F|0-33:A>G-33:A>G	5	130684422	TGCAGAAGATGCTGGAGGACATCGTGAAGGGCGACGACGGGAGCCGCGGCGGCGGCGTGGGCGGCCGCG	NA	GTGAAAAAGGAGAAGCCGGACACGCTGGAGGACCTGCAGAAGATGCTGGAGGACATCGTGAAGGGCGACGACGGGAGCCGCGGCGGCGGCGTGGGCGGCCGCGTGCCGCCGGACGGGCCGCGGCGGGCGCGCGTCGCGCCGTACCCGCAG	NA
23561721	0	0	TGCAGATTATTATCCGAGGTGCCCG	NA	NA	NA
30278234|F|0-39:G>A-39:G>A	0	0	TGCAGTACATTACTTGAGTAGAGTACCCAAAGGAATTCTGGGCACCAACTGTTCAGGTTCTTGACAACC	NA	NA	NA
23593708	0	0	TGCAGGTATGAGAAAGGTTAAATTATTGCCGTTGCTGCGCTAGCTGGGAGTGGAGTCTATATGACAATC	NA	NA	NA
23627155|F|0-7:G>A-7:G>A	0	0	TGCAGGCGGGAGCCTCCCAGAACGCAGGCACGCAGCCG	NA	NA	NA
23643473|F|0-20:G>C-20:G>C	4	187389209	TGCAGCGAGCGCAGGTGCATGAGCCCCACATCGACGTGCGACTCCTCCTCGCCGAAGTGGCACCGAGAT	AATCTTTTTCATGAACTCCAAATATTTTATTTGGATTGTCCGTATCTCAATCTATCTCTGGGAATTTTTCTGGAATTTTTGTGATNNNNNNNNNNNNNNNNNNNNNNNNNNNNNNNNNNNNNNNNNNNNNNNNNNNNNNNNNNNNNNNNNNNNNNNNNNNNNNNNNNNNNNNNNNNNNNNNNNNNNNNNNNNNNNNNNNNNNNNNNNNNNNNNNNNNNNNCTTGATTTTTCTTTACACGGGAAAAGGAATTCTGAATTTTTTTTTAAAAAAGGAAAACTATTCCTTTTGGTACTGGGCCGAGNNNNNNNNNNNNNNNNNNNNNNNNNNNNNNNNNNNNNNNNNNNNNNNNNNNNNNNNNNNNNNNNNNNNNNNNNNNNNNNNNNNNNNNNNNNNNNNNN…	NA	alpha carbonic anhydrase 7 [Setaria italica]
23606518	0	0	TGCAGCCGCGAGGACGACGACGAAGGGAGCGCGGCGAGGGCGCGCCGCGCCG	NA	GCTGCCTGTCGGTGAGCCCGACGCGGCCCACGCGCTGCAGCCGCGACGACGACGAAGGGAGCGCGGCGAGGGCGCGCCGCGCCGGCGACGGCTGCTGCGGCGGGCGGCGCGACGAGTTGGGCTGCTCGACCTGCCGCACCGGCACGAGCT	NA
23570280	0	0	TGCAGTGCGGCCTGCCTCCCAACTCTCTCTCGCTGCAACTCCCGACCAAGACTTGCCCTCTAGCTCGCA	NA	NA	NA
23644354|F|0-25:A>G-25:A>G	8	540631	TGCAGGGAGTGGGAGTGGATGGCGCAGAGCAGGGGAACGAGGAGATCGGCGAGGCGCGGGTAGCGGTCG	NA	CGGACTTCCAGCGCCTCGCCGGCGACCGCTACCCGCGCCTCGCCGATCTCCTCGTTCCCCTGCTCCGCGCCATCCACTCCCACTCCCTGCGGCGCTTCGCCGACGCCTACTCCTCGTTCGAGAAGGCTGCCAGCGCATTCCTGCAGGAGT	enhanced ethylene response protein 5 [Setaria italica]
23617372|F|0-11:C>G-11:C>G	0	0	TGCAGCCATGCCCGACCCAGGGACAGCTCCCGCGACACGGAGCGCCGCCG	NA	NA	NA
23630423|F|0-31:A>G-31:A>G	5	78145598	TGCAGGGCTGCGACGCGTCGGTGCTGCTGTCAGGCCCCTACGACGAGCACAGCGCGGGCGCCGACACGA	NA	GGCGATCTTGACTGCTGTGCTGACTGCAGGGCTGCGACGCGTCGGTGCTGCTGTCGGGCCCCTACGACGAGCACAGCGCGGGCGCCGACACGACGCTGTCGCCGGACGCGCTCGACCTCATCACCCGCGCCAAGGCCGCCGTCGACGCCG	peroxidase 16 [Setaria italica]
23614288|F|0-6:C>T-6:C>T	3	54759027	TGCAGTCCCTGCGTGCGAAGCGCACCATGAGTCCGTGCTTCATGTAGAGCGTGGTGTTGAGCTTGGGCT	NA	NA	cytochrome P450 86B1 [Setaria italica]
23601541|F|0-5:C>G-5:C>G	0	0	TGCAGCTCTCTGATTTGTTGCTTCCCG	NA	NA	NA
23593756|F|0-52:A>G-52:A>G	0	0	TGCAGGTCCGACGACGACGCCGCCGCCCAAGACCACCACCAGCAGCTAGCTCAACGTCACCTGCCGCGC	NA	NA	NA
23640208|F|0-49:C>T-49:C>T	3	217048061	TGCAGGTGGAAGTTCTCGCATTTTCACAACCGTCTACGTGAGCGTAGGGCTGTCCG	NA	GGGGGATAGCTCCAGCTATCTGACATATCTTCCAGCCCAGTGAATGGCCGGACAGCCCTACGCTCACGTAGACGGTTGTGAAAATGCGAGAACTTCCACCTGCAGTGCTCGGCTCCTATGACGTATACAGGCTTCCCAGTGCTGCATGCC	mitochondrial fission protein ELM1 isoform X2 [Setaria italica]
23634735|F|0-35:A>G-35:A>G	0	0	TGCAGTTCACCCCTGCACAGCGGGCATGTGTTGTTACACGCCATCAGCCAGTCGGCAATGCAGGCCCTG	NA	NA	E3 ubiquitin-protein ligase Os03g0188200 [Sorghum bicolor]
30277688|F|0-44:C>T-44:C>T	0	0	TGCAGGCTTGCCCTGGTCGACGACGACGGCAGAAGGCTCGACTTCGCCACTGACAAATACTGCACAGAG	NA	NA	hypothetical protein DRI48_01385 [Chloroflexi bacterium]
23603310|F|0-48:T>C-48:T>C	0	0	TGCAGGTAATTCACCAATGGGGATCAGATTAGCAGTTGCCGTTGAAGATGACGGCCG	NA	NA	NA
23644438|F|0-9:C>G-9:C>G	0	0	TGCAGGGCCCACGCGCTCGTGCTCCG	NA	NA	NA
23637089|F|0-57:C>G-57:C>G	3	280716165	TGCAGCTGTGTGGGCGCTACTTCGACTTCGGAAGCTCGAGCTGTGAATGGATAGATTCGAAGTGACCGA	NA	GGCTTGGCGAGGGCAGGCATAGCGGCGAGTGGGATCTCGAAAGACAGGGAGGGCTCTAGAGACTGCAGCTGTGTGGGCCCTACTTCGACTTCGGAAGCTCGAGCTGTGAATGGATAGATTCGAAGTGACCGGGTCGCCCGGTTTTATAGG	NA
23634691|F|0-59:T>C-59:T>C	0	0	TGCAGTGCTTTCGCGTCAGTCCTGATCGATGAGCCTGAAGAAAAGGCCATTCATGCGTCTAGTTAGGAG	NA	GGAGTAGCTGCTGCCGGCACTGCCGGCACTGGTCATTGGCGCGTCCGGATTGTCTTTTCCAGACTAGTATAAAGGCCTTGCTTGTTCCTGCAGTGCTTTCGCGTCAGTCCTGATCGATGAGCCTGAAGAAAAGGCCATTCATGCGTCCAG	NA
23610213|F|0-49:G>C-49:G>C	0	0	TGCAGAATCAAAGGCTGGAAGCGAAGCGTGCAGCAGCAGTTAGTAATATGCTAGGAGGAAACTCATGGG	NA	GGATAACATGGCTTAAAGGGCGGGATTAGCCCATGAGTTTCCTCCTAGCATATTACTAACTGCTGCTGCACGCTTCGCTTCCAGCCTTTGATTCTGCAGGTTTCGACGAGCCCTCACGAGTGCTGCTCCACCCGACCGGGTCACGCTGCT	NA
9976877|F|0-24:G>A-24:G>A	0	0	TGCAGGCGGCGTTTGGGCTGCGGCGGTGGGCGCGTCGGTGGCGTACAGCCG	NA	TCTGAATAATTTGCTTGCTTGCTGACGAGAGAACTACTGACTGTATGCTGCAGGCGGCGTTTGGGCTGCGGCGGTGGGCGCGTCGGTGGCGTACAGCCGGCGGAGCGCGCCGCAGCGGGCGACGAGCTTGAGGTTCATCCACGCCAGGAT	NA
23641842|F|0-43:T>A-43:T>A	5	121047556	TGCAGCTCGCATCGCTCGCTAGTGACTGACACTCTGACATGACTTTGTTTTTCCTGCCACGCGTTGCAG	NA	NA	NA
23641967|F|0-67:A>G-67:A>G	3	228716587	TGCAGGGGTACCGCAACGTGATGGAGAACTGCATGGAGAGCGCGCGGACGCTGCGGGAGGGTCTGGAAC	NA	CGGTCCTTGGAGATGATGGTGAACCGGCCCGTGCGTTCCAGACCCTCCCGCAGCGTCCGCGCGCTCTCCATGCAGTTCTCCATCACGTTGCGGTACCCCTCGAAGCCCAATCGAAGGAACTGGTAATACTGCGCGATGATCTGGCTAGAC	glutamate decarboxylase 2 [Setaria italica]
23624048|F|0-23:G>C-23:G>C	0	0	TGCAGGCCCTCGGAGTCGACGCGGAAGGCGGCGGAAGGGCCCTCGCCGTCATCGGAGGAGGCGGGGAAG	NA	CGACGCCAGTTCATCAATCTGACGCTGCAGGCCCTCGGAGTCGACGCGGAAGGCGGCGGAAGGGCCCTCGCCGTCATCGGAGGAGGCGGGGAAGCCGGCGAACTCCTCCATGATCCGCCGCGCCGCCGCGTCGTCGTGGCCCGCCGCGAC	probable ureidoglycolate hydrolase isoform X2 [Panicum hallii]
23633468|F|0-21:G>A-21:G>A	5	129213671	TGCAGAAGCGTACGACATCGCGGCACTGAAGTTCAGGGGCGAGAATGCTGTCACCAACTTCGAGCCCAG	NA	TGGGGATCTCACGTTGAGCGATTTCTCGCAGGTTGTACCGGCTGGGCTCGAAGTTGGTGACAGCATTCTCGCCCCTGAACTTCAGTGCCGCGATGTCGTACGCTTCTGCAGCCTCTTCTTCGGTTGCGAAAGTCCCAAGATACAGGTCCT	AP2-like ethylene-responsive transcription factor AIL5 [Dichanthelium oligosanthes]
30284244|F|0-20:A>G-20:A>G	0	0	TGCAGCGCGCGCTCCACGACAGCCCGAAAGTTCCCGAGCTGCCTCTCGTGCTTCGCCACCTCCTCCATC	NA	NA	NA
9972908|F|0-15:T>A-15:T>A	0	0	TGCAGAGGTGCTAGATGGGAGGCCAGCCG	NA	NA	NA
23591173|F|0-6:C>T-6:C>T	4	184209655	TGCAGCCTTATTCTTGACGACGTTCTCCCCCAAGCTGAACGGCGGCGGCACGTACGGCGGCGTGGCGCA	NA	CCGCTGCCGCCACCAGCACCTGCAGCCTTATTCTTGACGACGTTCTCCCCCAAGCTGAACGGCGGCGGCACGTACGGCGGCGTGGCGCACCGGAGCAGCGCCCAGTTGACGCCGCCGAAGAACGGGTGCCGCTTGATCGCCGCCGCGCCC	serine/threonine-protein kinase D6PKL2 [Setaria italica]
23633785|F|0-20:A>C-20:A>C	3	3168950	TGCAGCAGCATCACGCCCAGAGAGTAGACGTCGGACTTGACCCCCAGCATCCCCGTCTGCTGGTACTCC	NA	TGGCCGCGCTGTGACGATCTGCAGCAGCATCACGCCCAGCGAGTAGACGTCGGACTTGACCCCCAGCATCCCCGTCTGCTGGTACTCCGGGTCGATGTAGCAGAAGGTGCCGGCGGCGGAGGTCATGTGGCACTGCGTCACGTTGTCGGC	U-box domain-containing protein 35-like [Panicum miliaceum]
23603083|F|0-25:G>C-25:G>C	0	0	TGCAGGGCTGCTGCATCTGGGGCTTGAGCGGGCAGTGCGGGCGCCAGGCGGGAGGCGGCCG	NA	CATTTTCTTCTGCAGGGCTGCTGCATCTGGGGCTTGAGCGGGCAGTGCGGGCGCCAGGCGGGAGGCGGCCGGTGCCAAGCTACAGTCGCGCGCGGAAGAGGAAGCGTGCGGCCTGAGTCCACGGAAGCGGCGGCGCGCGGAGGTGGAGCA	NA
23637508|F|0-11:C>G-11:C>G	4	36940106	TGCAGTTGAGGCCGAGGAGGGCTCGGATGCGATGGAAGAGGTTCTTGAGGTAGACCTTGTCCTTGAGGA	NA	CGAAGACGAGGCTGCAGTTGAGGGCGAGGAGGGCTCGGATGCGATGGAAGAGGTTCTTGAGGTAGACCTTGTCCTTGAGGAAGGCCGGGGAGCGATTGGCACTGCAGAGCTGCACGAGCCAGCAGGAAAGATCCACGCACACCTTCTTGT	flap endonuclease GEN-like 2 isoform X1 [Panicum hallii]
30275343|F|0-61:A>G-61:A>G	6	103447582	TGCAGAGATCCAATTTTGTAGAGAACAAAATTAAAGATCACATCACTGTCCCATTGATCAGACCATTTC	NA	NA	NA
23634506|F|0-39:A>C-39:A>C	6	239021821	TGCAGGTACTTGAAATTTGCCTGGCCCGCATTTTCACGCAGAACCACCGTATTCGAGGGGCCG	NA	TCGATTTCAGGGGCTAGCTGGTGAGAAGCTTCTTGACTTTGGCGGCTGGGCTAATGGGACACGGCGCCGGCCCCTCGAATACGGTGGTTCTGCGTGAAAATGCGGGCCAGGCAAATTTCAAGTACCTGCAGCAGCTGGAGCGGAGCAGAG	NA
23600245|F|0-15:G>A-15:G>A	0	0	TGCAGCCATGGAGGCGCCTCCTATCCCCG	NA	NA	NA
23639712|F|0-5:A>G-5:A>G	5	103793300	TGCAGATCCTCGTACGCCGTCACCGACGCTGCCGTCGCGCCGACCCCG	NA	CACCACCACCCACCAAGCCAACCACAGGAGCTGGGGCTTGGCTGGAGCTCCCCCGGCGACGGACAATGGCGACGGCGTGGGTGCGCTCGCTCAGCTGCAGATCCTCGTACGCCGTCACCGACGCTGCCGTCGCGCCGACCCCGGCCAAGA	uncharacterized protein LOC101767184 [Setaria italica]
23643649|F|0-37:A>G-37:A>G	0	0	TGCAGTAGAGACAGGGGTGCTGCTCGAACCCCTTCTCACGCAGCAGCTCCCTGGCCCG	NA	NGGCGCGTCGGCGTTGGCGTCGCTGCAGTAGAGACAGGGGTGCTGCTCGAACCCCTTCTCAGGCAGCAGCTCCCTGGCCCGGCTCACCACCTCCCGGTTGCTCACCGGCGCCGGGTGCGGCGCCAGCACGGCCTGCACCGCGCTGCTGAA	metacaspase-9 [Setaria italica]
23612910|F|0-48:G>A-48:G>A	7	79315208	TGCAGGACCAAGAGAACAAGAAGTAGGATTGCAGCAAGTCTGGAGATCGATCTGGCTCTGCACTCTAAT	NA	CTACCAGCCGAGGCAAGTCCTAATAATAACAAAAAGAAAAGAAAAGAAAGAAAAAATTATGTACACGCTGCTGCAGGACCAAGAGAACAAGAAGTAGGATTGCAGCAAGTCTGGAGATCGATCTGGCTCTGCACTCTAATTTGGCTACCA	NA
23612265|F|0-5:C>T-5:C>T	0	0	TGCAGCGTGACACCGTACACGCCGCCTCCTCTGAAGACTGAAGTGCTTCAGGCTAGAGGCCCAAGTACC	NA	NA	NA
23602480|F|0-52:G>A-52:G>A	0	0	TGCAGGCATATCGTCAAGGTCTGTGTAATGCTTTAATTTACATGTCCCAAATGTCTTACCG	NA	NA	NA
23550889	0	0	TGCAGAAACAGCTCTACATCAGCGAGAAGACGCCGCGCCG	NA	NA	NA
23559178	0	0	TGCAGTGGATTGATCGGAATGGCCG	NA	NA	NA
23545309	0	0	TGCAGAACAGGTTAAGTGAAGATCCTGCATATTGGTCAGGTTGCCAAGGTCCCTGACATCATCACCCGA	NA	NA	RecName: Full=Disease resistance protein RGA5; AltName: Full=Os11gRGA5 [Oryza sativa Japonica Group]
23551956	0	0	TGCAGAGGCCTCCAGATGAGGAGGTCCG	NA	NA	NA
23546971	0	0	TGCAGCATATCCAGAGTGTCAATAATCGTCGTGTTAACGGATACATCCCAGACATCCAGGCCTGCTTGC	NA	NA	NA
23545643	0	0	TGCAGACGGTCGTAGCTGTGCGGAAGAACCAGATCCATATCCTGTTTCAAGCGGGCTGCTTCCTCTGCC	NA	NA	NA
23552585	0	0	TGCAGCAACCAGGCTGACCATGTAGATGGTCGTGTAAGCCTGCCTACAGCAGCCG	NA	NA	NA
23558229	0	0	TGCAGGTTATTATTTTCGATCTTCTGGGATACCG	NA	NA	NA
23636976	7	5660689	TGCAGCGCGCACGGATCCTCGAGCATTTCCTCGGCAGCGACGAGCAGGCCGCCAGGGGCTTCGCCCGAG	NA	CAGAGCTGGGCGAAGCCCCTGGCGGCCTGCTCGTCGCTGCCGAGGAAATGCTCGAGGATCCGTGCGCGCTGCAGCAGCTCGACGTCCTCCGCCGTGCACGCCACCTGCGACATGAAGTAGCAGTAGGCCGTGACGGGCCTCTCTTCTTCC	unnamed protein product [Triticum turgidum subsp. durum]
23637849|F|0-8:T>C-8:T>C	2	46987024	TGCAGCAGTCTTAACCAATAGAAATTGCATGCATGCTCATACGCCG	NA	NA	NA
30290093|F|0-23:C>T-23:C>T	0	0	TGCAGCGTCCGATTTTTTACCGCCGCCG	NA	NA	NA
23624218|F|0-57:A>G-57:A>G	5	151065367	TGCAGGGACTGTAGTCAGGCAGGCACAGGCAAGAACACAGAGAGTTCACGCGCGGACAGTTGACCCCTC	NA	CTGAAATTAACACGGCACGATACAGACGGGTAAACTGCAGGGACTGTAGTCAGGCAGGCACAGGCAAGAACACAGAGAGTTCACGCGCGGACGGTTGACCCCTCCTGCTTTACTCCTTTGCGGTCTTGTTGATGAGAGACTTGTGGATGT	NA
23609995|F|0-7:A>G-7:A>G	2	3918965	TGCAGAAAACATGAATTATTCAGGTTGAGGATCACAACATACAAATTAAAGCATATATATAACTACTAA	NA	NA	NA
23598317|F|0-40:T>C-40:T>C	0	0	TGCAGAATATCTCCGCCCCGTGCGGTGGGCCGTGTTGCACTTGCCG	NA	NA	NA
23622543|F|0-16:T>C-16:T>C	6	44532212	TGCAGATGTGGGCGTGTGAATTTTGGAATTGGGTGATCATGTATGTCGAATTACGATGTGAACGCACAG	NA	ATCAACAGCACCGGTCGAGCTTGTCGTCTGCCTGATCTCAGCTTACGAATTGAACCATGCCGAACTAGCTCTTGGATTCTGTGCGTTCACATCGTAATTCGACATACATGATCACCCAATTCCAAAATTCACACGCCCACATCTGCAGTC	NA
23624444|F|0-42:G>C-42:G>C	3	257019186	TGCAGGTGCCACCGAACTGCTCCCAACAAGCACGTAAGAAAAGGCAGGATCAAATCCAACCCAGATAGT	NA	CCTGGCTTGACATCATACCTATGACACAGTTGCAGAGAGAGTAAAGCGTCAGTTAGCTCGCAGTTTAGCTGCAGGTGCCACCGAACTGCTCCCAACAAGCACGTAAGAAAAGGCAGGATCAAATCCAACCCAGATAGTTCTGATTATGAC	NA
30286830|F|0-29:A>G-29:A>G	0	0	TGCAGTGCTTCTGGTGAAGAACGGGAAGAATCAGGGTCGTCTCAGGGACGTGAGGCCTCTGCCG	NA	NA	NA
23612073|F|0-37:T>C-37:T>C	0	0	TGCAGCGCCGCCGCACGCTGGAGCGCCGAGCCGCCGCTGCCTCGATTCAGGCGCACAGGGGTGCAACCG*	NA	CTCGCCGCCATCTGCAGCGCCGCCGCACGCTGGAGCGCCGAGCTGCCGCCGCCTCGATTCAGGCGCACAGGGGTGCAACCGGAGCAAATCATCACCACCAGGAGCCTCCTCGCGTCGAGCCGCACGTGCTCCGCCGCTCCCCATCGCAGG	NA
23602072|F|0-17:C>T-17:C>T	0	0	TGCAGGACGCCTCGGCGCGGAGCTCGCCGCCGCCGACGACGCGCCAGCCG	NA	NA	NA
